# Supplementary material for: Tracking Over 30 Years of Coral Reef Infrastructure Degradation in Barbados
Source: Research Square preprint supplement (doi:10.21203/rs.3.rs-4499405/v1), 2024-06-19
Supplement: Supplementary file 1 [file 2dcb097017dd6352314016a9.docx]

**Supplementary Data**

Table S1: Surface area of 14 out of 20 reefs and calculated area and percent loss (red) and gain (green) over 1000m2 changes for 1950, 1991, and 2022.

**
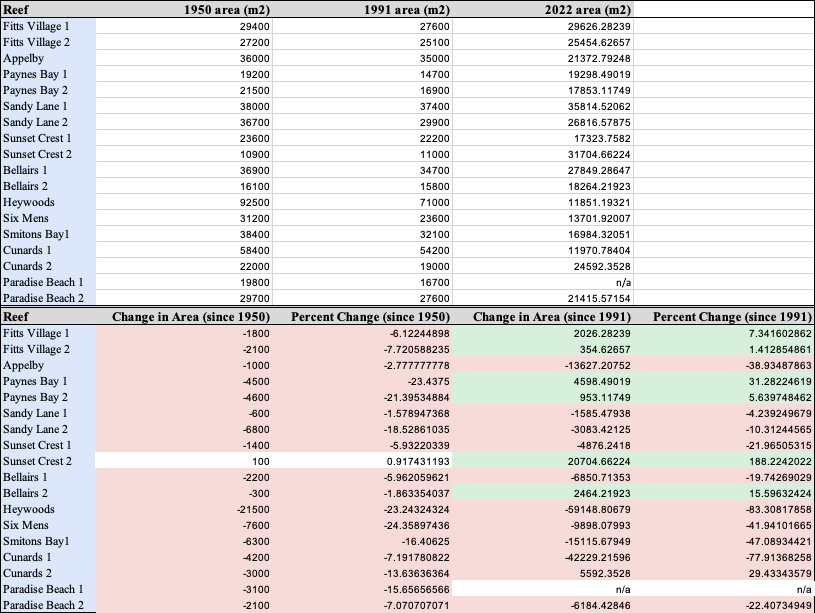
**


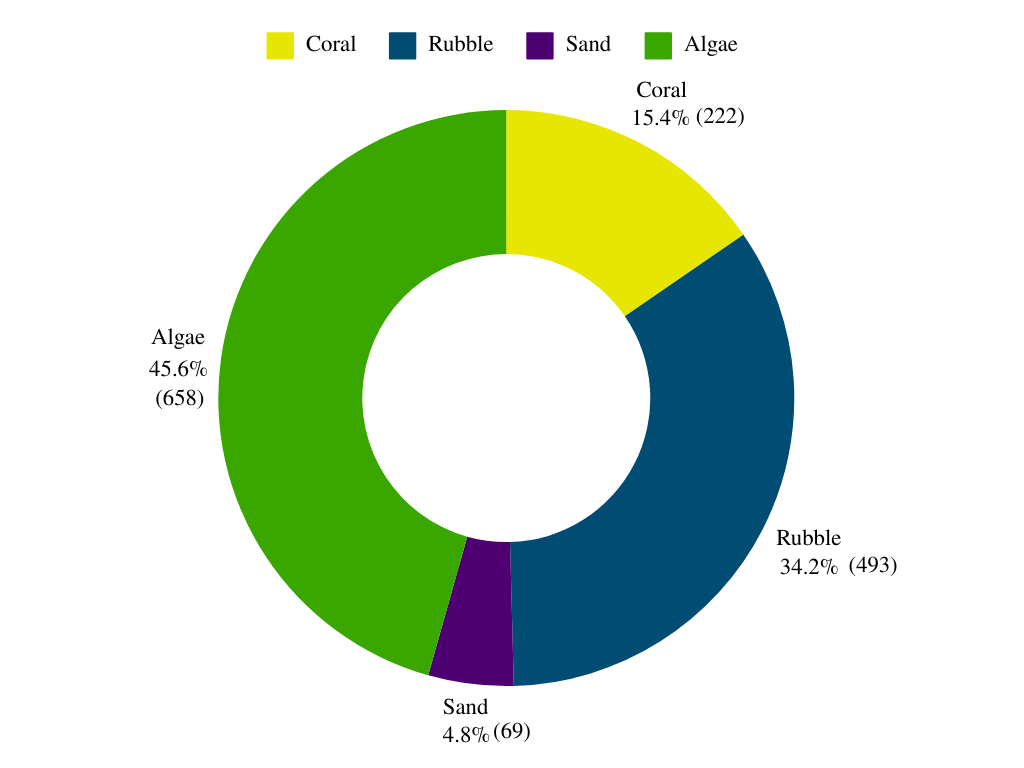


Figure S1: Percent Distribution of Present Substrate in the 5 highly degraded sites
